# Supplementary material for: A Comparative Study of the Synthesis and Characterization of Biogenic Selenium Nanoparticles by Two Contrasting Endophytic Selenobacteria
Source: MDPI journal article supplement (doi:10.3390/microorganisms11061600), 2023-06-16
Supplement: s1 [file s1]

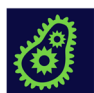

## Supplementary materials

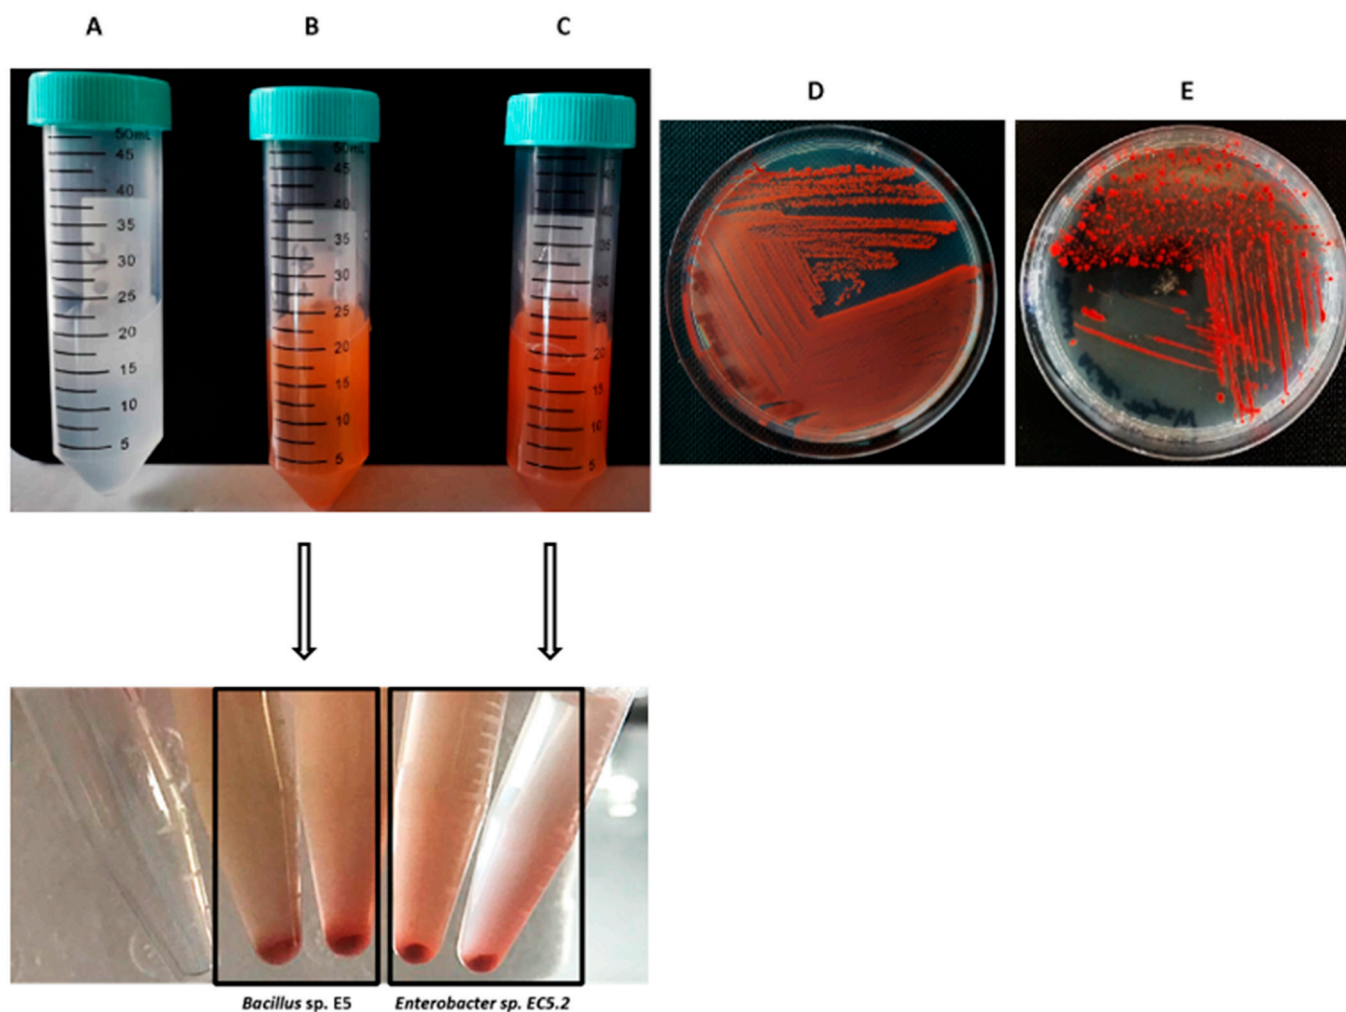

**Figure S1.** Growth of *Bacillus* sp. E5 and *Enterobacter* sp. EC5.2 in Tris-HCl pH 8 in the presence of selenite (A= without selenite; B= *Bacillus* sp. E5; C= *Enterobacter* sp. EC5.2). Liquid (A, B, C) and solid medium (D= *Enterobacter* sp. EC5.2; E= *Bacillus* sp. E5) turned to red only in the presence of 5 mM selenite. Images were obtained after culturing for 6 h (A, B, C) and 24 h (D, E).

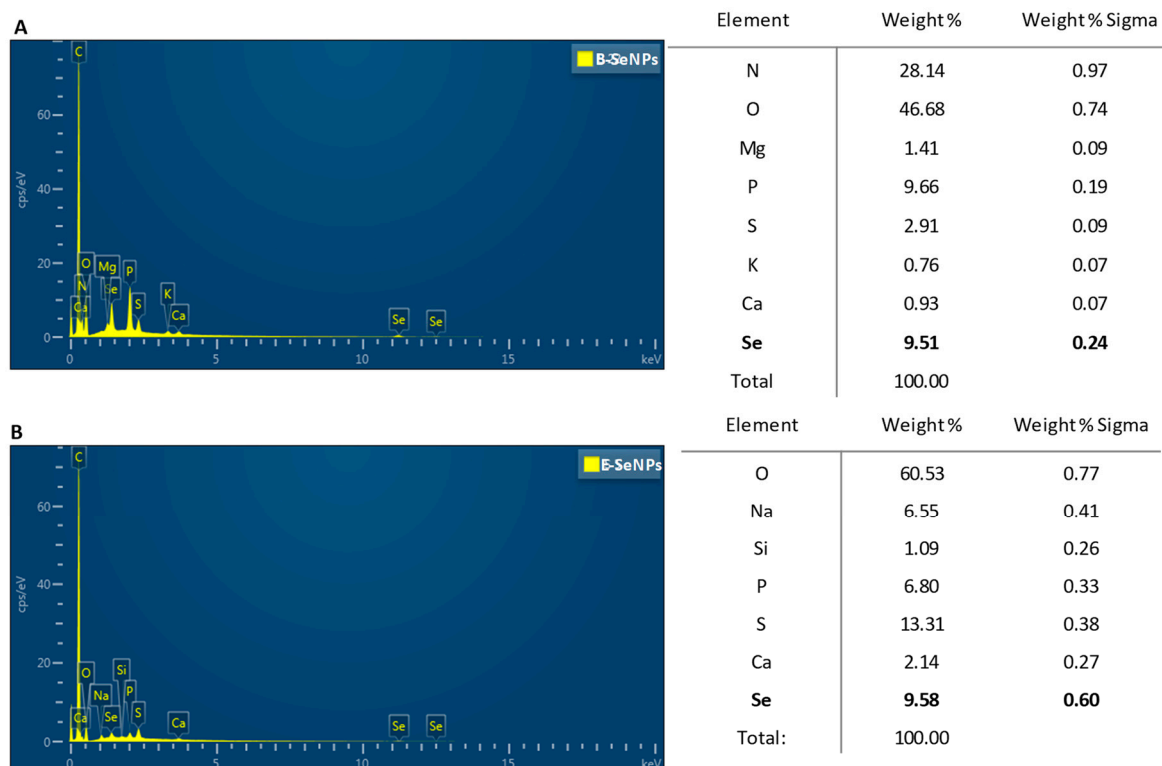

**Figure S2.** EDS graph of selenium nanoparticles (SeNPs) biosynthesized by *Bacillus* sp. E5 (A) and *Enterobacter* sp. EC5.2 (B) with 5mM of  $\text{Na}_2\text{SeO}_3$  for 6h.

**Table S1.** Total Se content in bacterial biomass of two endophytic bacterial strains (*Bacillus* sp. E5 and *Enterobacter* sp. EC5.2) isolated from wheat plants, grown with and without Se supplementation.

| Bacterial strain              | Se (mM) | Total Se (mg kg <sup>-1</sup> ) |
|-------------------------------|---------|---------------------------------|
| <i>Bacillus</i> sp. E5        | 0       | 40 ± 14                         |
| <i>Enterobacter</i> sp. EC5.2 | 0       | 9 ± 3                           |
| <i>Bacillus</i> sp. E5        | 5       | 12016 ± 4205                    |
| <i>Enterobacter</i> sp. EC5.2 | 5       | 3543 ± 1240                     |

**Table S2.** FTIR absorption bands and identification of *Bacillus* sp. E5 and *Enterobacter* sp. EC5.2 un-challenged cells, and biogenic samples (B-SeNPs, E-SeNPs).

| $\tilde{\nu}$ (cm <sup>-1</sup> ) | Vibrational modes                      | Identification                                |
|-----------------------------------|----------------------------------------|-----------------------------------------------|
| 3280                              | $\nu$ (O-H; N-H)                       | Amide A (Proteins) [79]                       |
| 2927                              | $\nu_{as}$ (C-H in > CH <sub>2</sub> ) | Lipids [79]                                   |
| 1625                              | $\nu$ (N-H)                            | Amide I (proteins) [80]                       |
| 1529                              | $\nu$ (C-N)                            | Amide II (proteins) [79]                      |
| 1450                              | $\delta$ (-CH <sub>3</sub> )           | Proteins, lipids, polyesters, etc. [73]       |
| 1390                              | $\nu_s$ (COO <sup>-</sup> )            | Amino acid side chains; lipids; peptides [75] |
| 1233                              | $\delta$ (C-OH)                        | carboxylic acids [75]                         |
| 1054                              | $\nu$ (CC); $\nu$ (CO)                 | Polysaccharides [75]                          |

Where  $\nu$  and  $\delta$  indicate stretching and bending, respectively; *as* and *s* stand for scissoring and out of phase in plane vibrations.
